# Supplementary material for: Development of a diagnostic and drug evaluation system for acute inflammation using a novel [ 89 Zr]DTPA-sorbitol probe
Source: Royal Society of Chemistry journal article supplement (doi:10.1039/d4tb02061h), 2024-11-19
Supplement: d4tb02061h1.pdf [file d4tb02061h1.pdf]

## Supplementary Information

### Development of a diagnostic and drug evaluation system for acute inflammation using a novel [<sup>89</sup>Zr]DTPA-sorbitol probe

Seung Ho Baek<sup>a,c</sup>, Eun-Ha Hwang<sup>a</sup>, Sang Bong Lee<sup>d,e</sup>, Miji Kim<sup>a</sup>, Dong-Yeon Kim<sup>a</sup>, Jung Joo Hong<sup>\*a,b</sup>, and Kyung-Sun Kang<sup>\*c</sup>

<sup>a</sup> National Primate Research Center, Korea Research Institute of Bioscience and Biotechnology, Cheongju 28116, Republic of Korea.

<sup>b</sup> KRIBB School of Bioscience, Korea University of Science & Technology (UST), Daejeon 34113, Republic of Korea

<sup>c</sup> Department of Veterinary Public Health, College of Veterinary Medicine, Seoul National University, Seoul 08826, Republic of Korea

<sup>d</sup> SimVista, A-13, 194-25, Osongsaengmueong1-ro, Osong-eup, Heungdeok-gu, Cheongju-si, Chungcheongbuk-do, Public of Korea.

<sup>e</sup> Department of Biomedical Sciences, Chonnam National University Medical School, Gwangju 61469, South Korea

## Experimental section

### Materials

All chemical reagents, including sorbitol, were purchased from Sigma-Aldrich (St. Louis, MO, USA). 0.5M HEPES buffer (pH 7.4) purchased from Boston Bioproducts. <sup>89</sup>Zr-oxalate was provided by Korea Atomic Energy Research Institute (KAERI, Jeongseup, Korea).

### Animals

Specific pathogen-free 6-week-old C57BL/6 mice were obtained from SLC, Inc. (Shizuoka, Japan). All experimental procedures were approved by the KRIBB Institutional Animal Care and Use Committee (permit number: KRIBB-AEC-24177).

### Preparation of DTPA-sorbitol

Amino-sorbitol (0.5mmol), N-chlorosuccinimide-DTPA (0.6 mmol), and Dichloromethane (DCM) were added to a 1 ml pressure vial. The solution was stirred at 40°C for 4 h, dried over anhydrous MgSO<sub>4</sub>, and filtered; the filtrate was concentrated in vacuo. DTPA-sorbitol was obtained by preparative HPLC (ACN:H<sub>2</sub>O) with a 95.9% yield (white solid, 50 mg). The NMR data are as follows: <sup>1</sup>H NMR (400 MHz, MeOD-d<sub>4</sub>) δ 7.30-7.39 (d, J = 8.23 Hz, 6H), 4.02-4.05 (m, 1H), 4.00 (s, 1H), 3.93-3.97 (d, J=4.3 Hz, 6H), 3.88(s,1H), 3.87 (s,1H), 3.84 (s,2H). 3.80-3.83 (m,5H), 3.74-3.79(m,5H), 3.70-3.73 (m, 6H), 3.62-3.68 (m, 1H), 3.51-3.56 (m, 1H), 3.44-3.48 (m, 1H), 3.13`3.25 (m, 5H), 2.81`2.85 (m, 1H) ; <sup>13</sup>C NMR (100 MHz, MeOD-d<sub>4</sub>) δ 179.9, 172.0, 171.9, 170.1, 134.7, 130.4, 126.4, 115.3, 71.5, 71.0, 70.9, 70.1, 62.8, 62.1, 56.1, 54.3, 54.1, 52.9, 51.9, 49.3, 47.7, 31.9; HRMS (ESI) calculated for C<sub>28</sub>H<sub>43</sub>N<sub>5</sub>O<sub>15</sub>S<sup>+</sup>721.7, found 722.25.

### Cytotoxicity assay

Raw 264.7 cells (ATCC, USA) were seeded in a 96 well plate at a density of 1x10<sup>6</sup> cells/well and treated with the indicated DTPA-sorbitol concentration for 1, 3, 6, and 9 hours. Cells were cultured in 500 μL of Dulbecco's modified Eagle medium (Welgene Inc., South Korea) containing 10 % fetal bovine serum (Gibco, Thermo Fisher Scientific) and 100 U/mL penicillin–streptomycin (Gibco) at 37°C in a 5% CO<sub>2</sub> incubator overnight. After incubation with DTPA-

sorbitol for 9 hours, the cell medium was discarded and replaced with 100  $\mu$ l of WST-1 reagent (Takara Bio, Ohtsu, Japan) as indicated by the supplier. The cells then were incubated for 1.5 hours, and viability was calculated from absorbance measurement at 450 nm.

### **Radiolabeling of [<sup>89</sup>Zr]DTPA-sorbitol and Radiochemical yield**

[<sup>89</sup>Zr]oxalate was obtained from the Korea Atomic Energy Research Institute (KAERI, Jeongeup, Korea) and produced using RFT-30 (30 MeV cyclotron). [<sup>89</sup>Zr]DTPA-sorbitol was prepared through DTPA chelation. Synthesized DTPA-sorbitol was dissolved in 1 mL of 0.5 M HEPES buffer, followed by the addition of 37MBq of [<sup>89</sup>Zr]oxalate. The pH was adjusted to 7.4 using HCl then was gently mixed using a Thermomixer at 37.5 °C at 350rpm for 60 minutes. Radiochemical yield (RCY) of [<sup>89</sup>Zr]DTPA-sorbitol was analyzed by Radio-thin-layer chromatography (Radio-TLC) using a Bioscan AR-2000 scanner (Eckert & Ziegler, Berlin, Germany).

### **Statistical analysis**

All data are expressed as the mean  $\pm$  standard deviation (SD) from at least three independent experiments, and statistical significance of the difference was determined by unpaired Student's tests using GraphPad Prism 5. P values less than 0.05 were considered statistically significant.

## Figures of experimental section

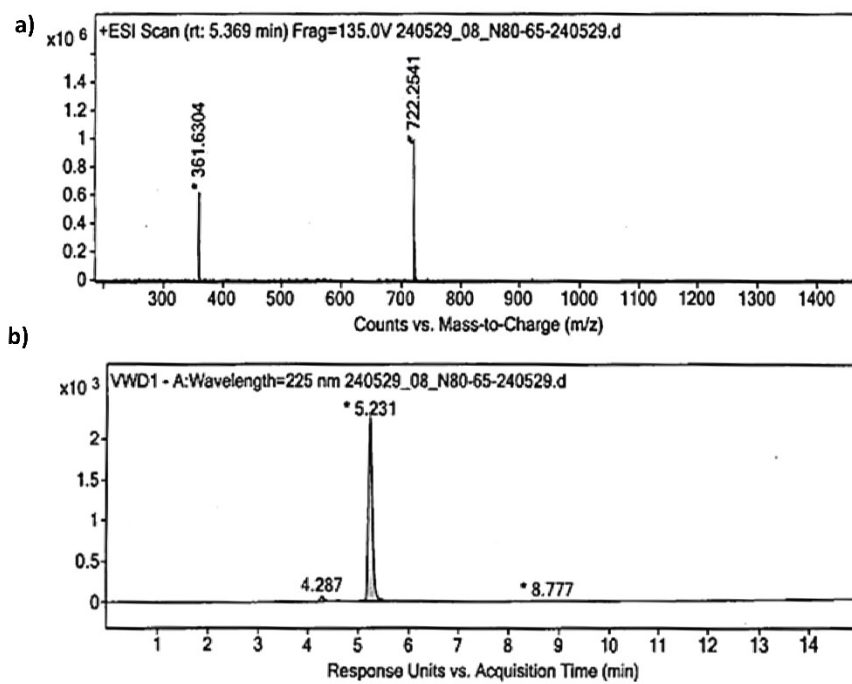

**Figure S1.** a) LC-Mass spectrum and b) HPLC spectrum of DTPA-sorbitol



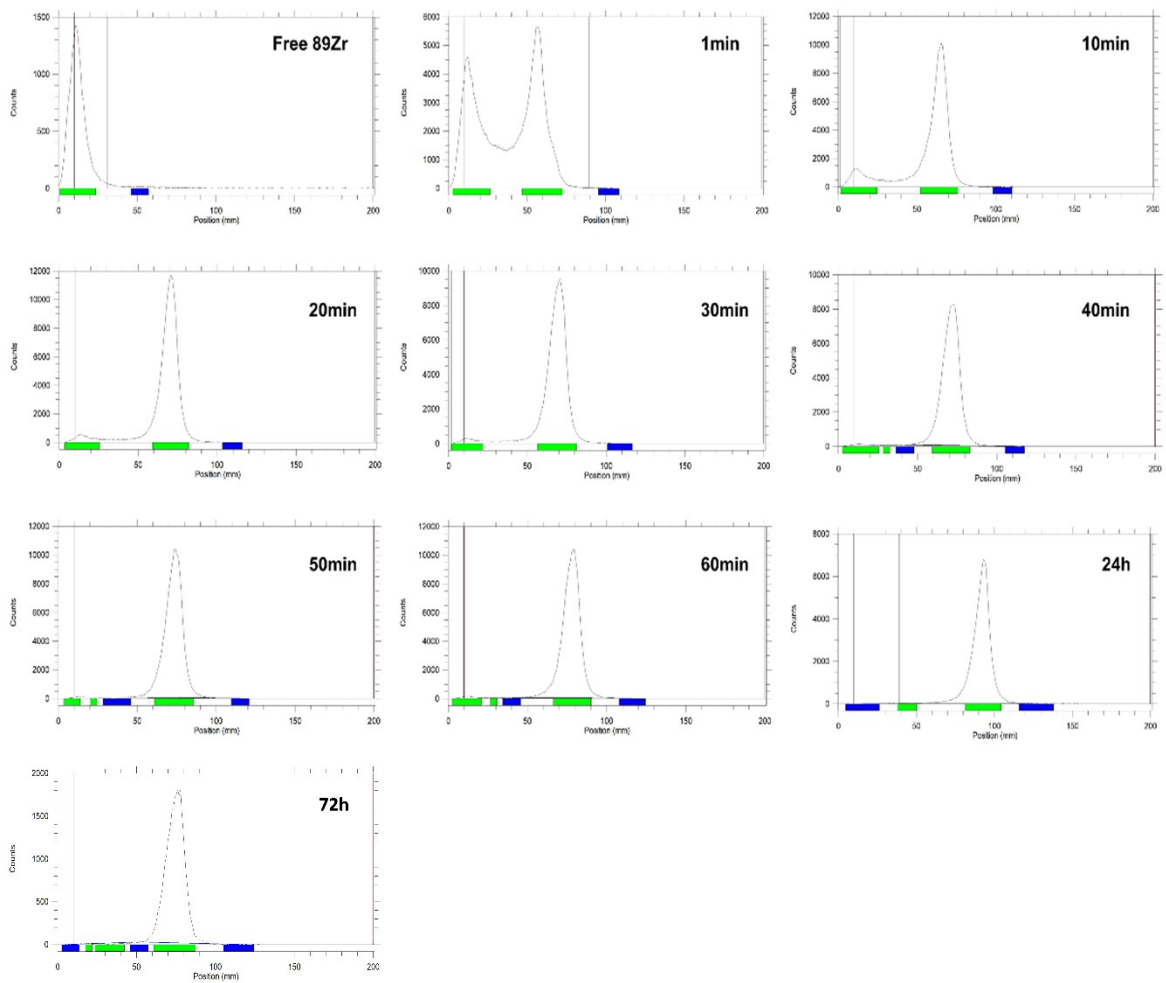

**Figure S3.** Radiochemical yield of  $[^{89}\text{Zr}]$ DTPA-sorbitol labeling monitored by Radio-TLC. Chelation of  $^{89}\text{Zr}$  with DTPA-sorbitol was completed within 40 minutes, and the binding remained stable for up to 72 hours.

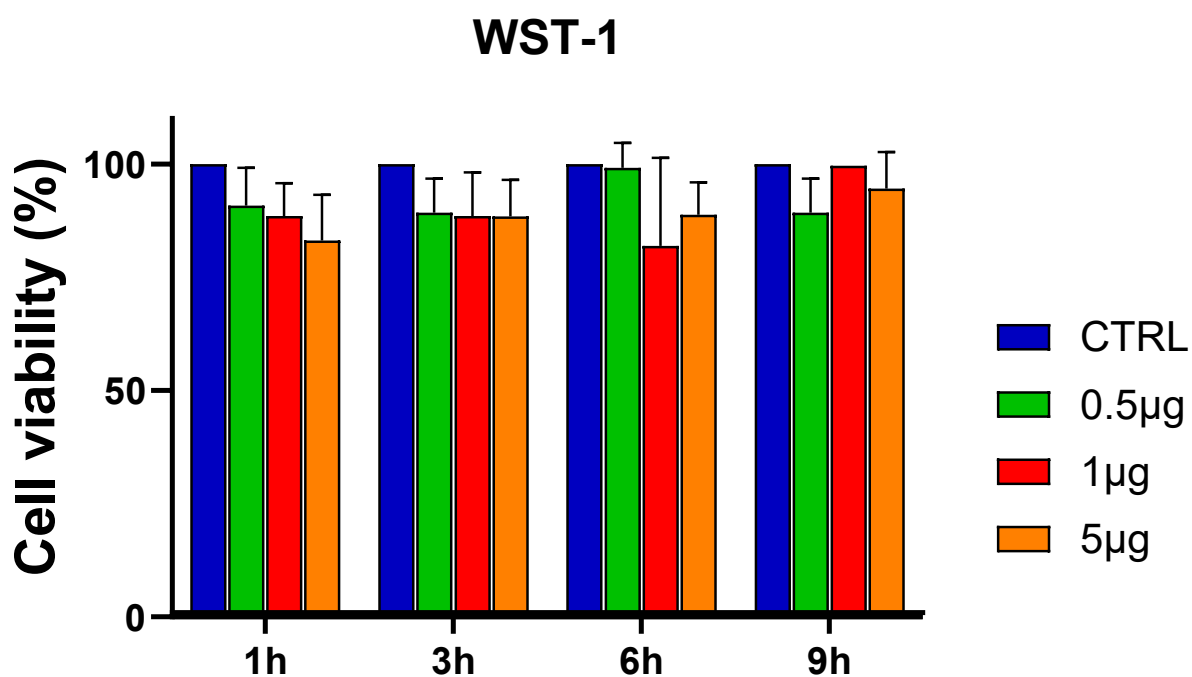

**Figure S4.** Cytotoxicity of DTPA-sorbitol. Viability of RAW 264.7 cells was assessed after incubation with various concentrations of DTPA-sorbitol at 1, 3, 6, and 9 hours. The data are presented as mean  $\pm$  SD of three independent experiments.

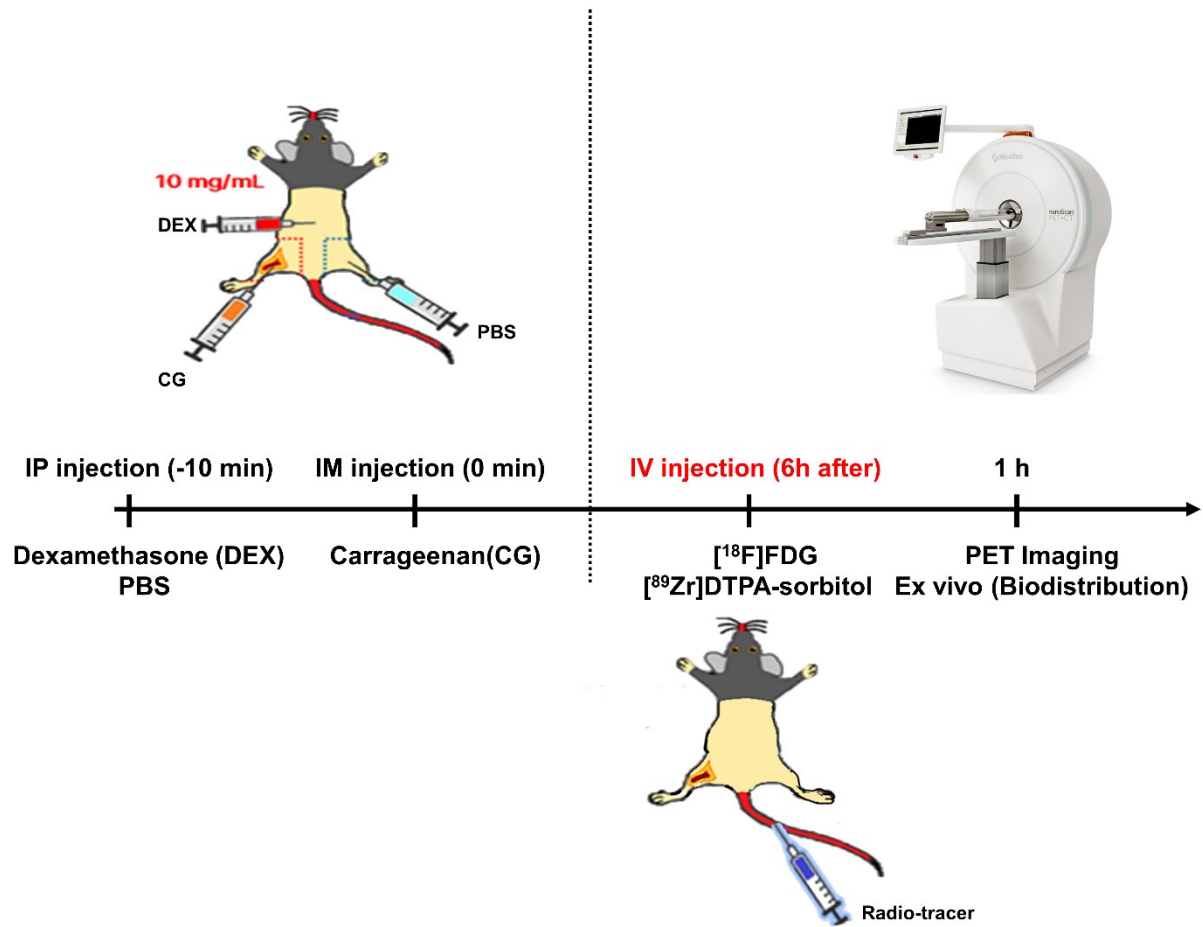

**Figure S5.** Experimental protocol for in vivo study. Mice received dexamethasone (20 mg/kg) via intraperitoneal injection, followed by the administration of 4% carrageenan and PBS into the left and right thighs, respectively, after 10 minutes. Six hours later, radiotracers were administered via the tail vein. PET imaging was conducted 1 hour after radiotracer administration. A biodistribution study was performed immediately following in vivo imaging.



a)

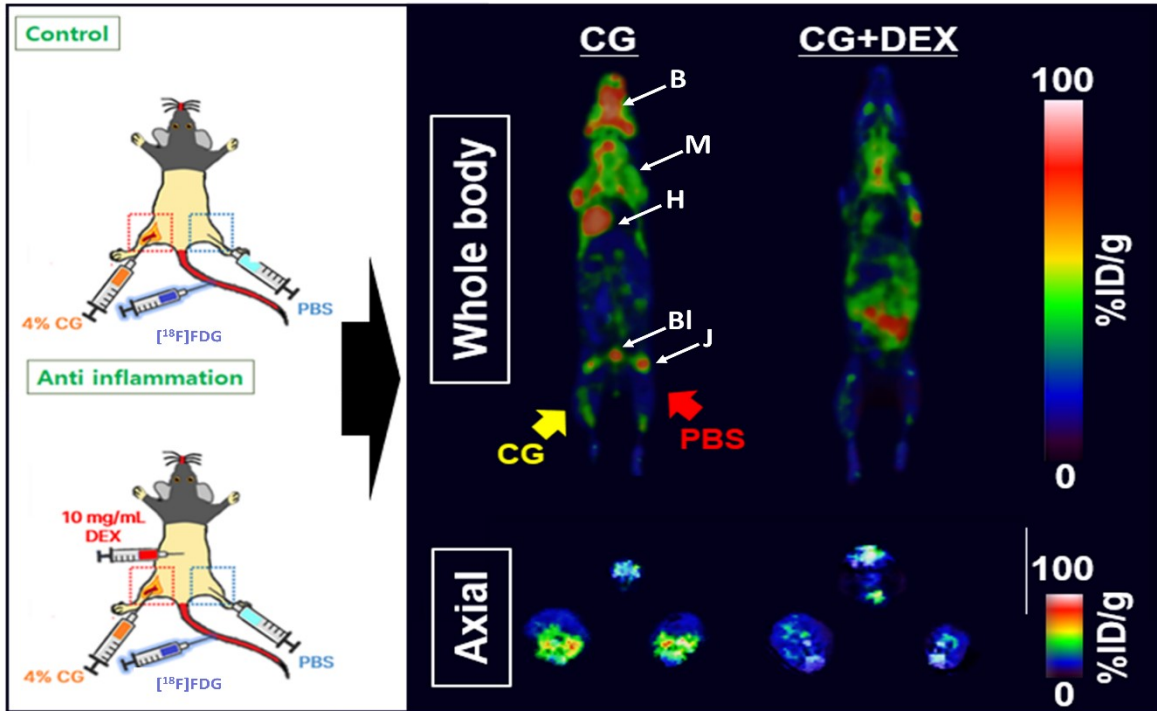

b)  $[^{18}\text{F}]\text{FDG}$

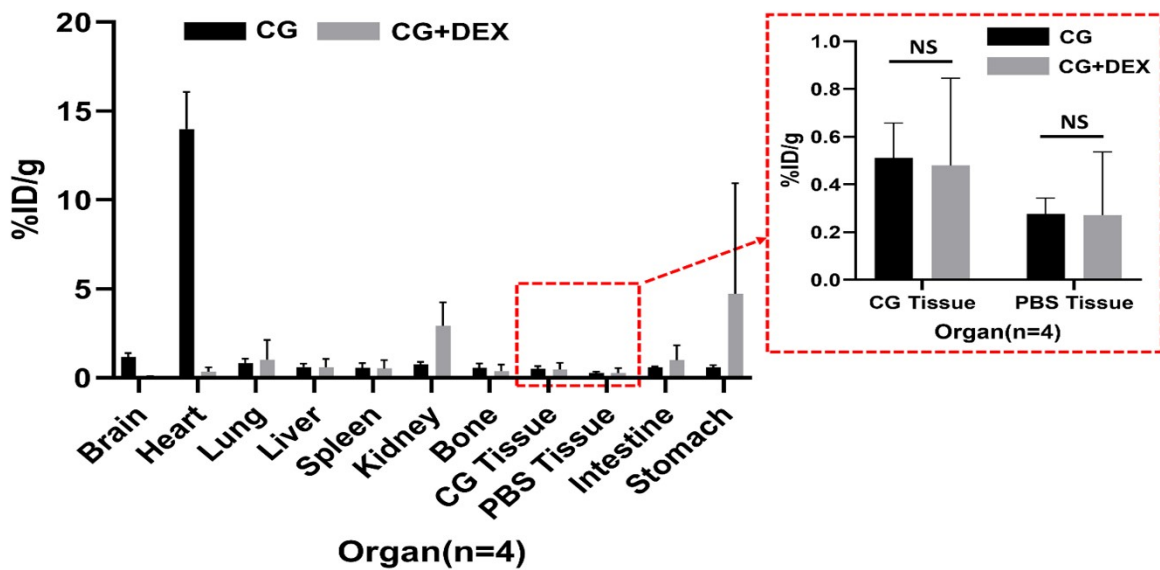

**Figure S6.**  $[^{18}\text{F}]\text{FDG}$  PET/CT imaging in carrageenan-induced inflammation mice and anti-inflammatory treated mice. Mice were administered same radioactivity of  $[^{18}\text{F}]\text{FDG}$  intravenously. Reconstructed PET/CT images are presented. B: Brain, M: Muscle, H: Heart, Bl: Bladder, J: Joint. CG: carrageenan, DEX: dexamethasone.
